# Supplementary material for: Empagliflozin Reduced Mortality and Hospitalization for Heart Failure Across the Spectrum of Cardiovascular Risk in the EMPA-REG OUTCOME Trial
Source: PubMed Central journal article supplement (PMC6416009; doi:10.1161/circulationaha.118.037778), 2018-12-06

**Empagliflozin Reduced Mortality and Hospitalization for Heart Failure Across the Spectrum of Cardiovascular Risk in the EMPA-REG OUTCOME Trial (Fitchett D, et al).**

**SUPPLEMENTAL MATERIAL**

**Contents**

Figure I. Summary of patients by baseline cardiovascular (CV) risk score categories (all categories) based on TIMI risk score – treated set.....2

**Figure I. Summary of patients by baseline cardiovascular (CV) risk score categories (all categories) based on TIMI risk score – treated set.**

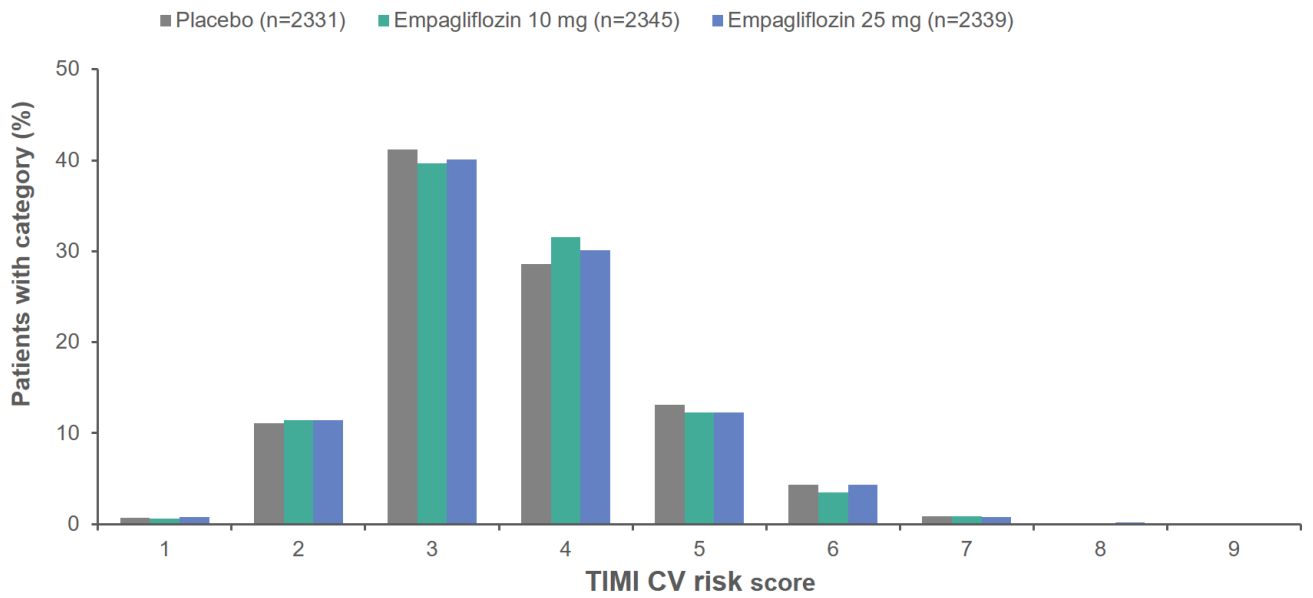

Supplement: cir-139-1384-s001.pdf [file cir-139-1384-s001.pdf]
